# Supplementary material for: Development and Validation of a Machine Learning Model to Aid Discharge Processes for Inpatient Surgical Care
Source: PubMed Central journal article supplement (PMC6991195; doi:10.1001/jamanetworkopen.2019.17221), 2019-12-11

## Supplementary Online Content

Safavi KC, Khaniyev T, Copenhaver M, et al. Development and validation of a machine learning model to aid discharge processes for inpatient surgical care. *JAMA Netw Open*. 2019;2(12):e1917221. doi:10.1001/jamanetworkopen.2019.17221

**eTable 1.** Categorized Reasons for Nondischarge and Definitions

**eTable 2.** List of Barriers Detected by the Machine Learning Model and Their Relative Weight

**eFigure 1.** Schema of Patients Included in the Training Set of the Neural Network Model

**eFigure 2.** Patient Populations and Cohorts With Corresponding Dates

This supplementary material has been provided by the authors to give readers additional information about their work.

**eTable 1.** Categorized Reasons for Nondischarge and Definitions

| <b>Reason</b>                                    | <b>Definition</b>                                                                                                                                                                              |
|--------------------------------------------------|------------------------------------------------------------------------------------------------------------------------------------------------------------------------------------------------|
| Clinical barrier                                 | a new clinical development occurring on the day of prediction that led to the team determining that the patient was not clinically ready for discharged                                        |
| Variation in clinical practice                   | a clinical determination made by the team that the patient should not be discharged when such decision was determined to differ depending on the attending surgeon responsible for the patient |
| No clinical reason                               | no clinical reason identified                                                                                                                                                                  |
| No reason identified                             | no clinical or non-clinical reason identified                                                                                                                                                  |
| Delayed follow-up on patient progress            | when the clinical team had identified a singular barrier to discharge that was surmounted by the patient from 07:00 to 17:00 but the patient was not discharged                                |
| Care transition issue to home or facility        | factors related to the home or facility's ability to receive the patient                                                                                                                       |
| Patient/family request to remain in the hospital | patient/family requested to be discharged on later date                                                                                                                                        |

**eTable 2.** List of Barriers Detected by the Machine Learning Model and Their Relative Weight

| <b>Barrier</b>                                                    | <b>Weight</b> | <b>Patients</b> |
|-------------------------------------------------------------------|---------------|-----------------|
| Not taking a regular oral diet                                    | 0.118         | 84.0%           |
| Home visiting nurse services not available                        | 0.117         | 0.2%            |
| Lacks social supports                                             | 0.102         | 0.2%            |
| Occupational therapy recommends disposition to inpatient facility | 0.04          | 15.4%           |
| Negative pressure wound vacuum in place                           | 0.032         | 7.3%            |
| Fever occurring within the past 24 hours                          | 0.032         | 16.5%           |
| Epidural catheter in place                                        | 0.031         | 26.6%           |
| Biliary drain in place                                            | 0.03          | 4.6%            |
| Currently ordered for IV antibiotics                              | 0.025         | 1.7%            |
| Chest tube in place                                               | 0.021         | 3.6%            |
| Received a blood transfusion within the past 24 hours             | 0.021         | 0.7%            |
| Currently ordered for an IV heparin infusion                      | 0.02          | 1.7%            |
| Needs assistance to ambulate                                      | 0.018         | 83.6%           |
| Penrose drain in place                                            | 0.017         | 2.3%            |
| Urinary catheter in place                                         | 0.015         | 61.7%           |
| Suction drain in place                                            | 0.015         | 26.3%           |
| Impaired level of consciousness                                   | 0.015         | 22.5%           |
| Lacks financial resources                                         | 0.015         | 0.2%            |
| Patient/family having difficulty coping with illness              | 0.014         | 0.3%            |
| Last WBC >12,000 cells/mL <sup>3</sup>                            | 0.013         | 31.6%           |
| Needs assistance to transfer from surface to surface              | 0.01          | 17.7%           |
| Currently needing oxygen supplementation                          | 0.01          | 46.0%           |
| Last blood glucose level >250 mmol/L                              | 0.01          | 8.4%            |
| Oxygen saturation <88% within the past 24 hours                   | 0.01          | 4.3%            |
| Needs assistance to stand                                         | 0.009         | 33.4%           |
| Hemoglobin level <7.0 g/dL within the past 24 hours               | 0.009         | 14.4%           |
| Uses a device to go from sitting to standing                      | 0.008         | 28.6%           |
| Not cognitively oriented                                          | 0.008         | 8.9%            |
| Not active out of bed                                             | 0.007         | 36.4%           |
| Nasogastric tube in place                                         | 0.007         | 23.3%           |
| Potassium level >5.0 mEq/L within the past 24 hours               | 0.007         | 8.9%            |
| Psychiatric/substance abuse history                               | 0.007         | 2.3%            |
| Needs assistance to sit                                           | 0.006         | 29.9%           |
| Imaging study not completed                                       | 0.006         | 53.7%           |
| Respiratory rate >30 breaths/min within the past 24 hours         | 0.005         | 38.0%           |
| IV narcotic administered within the past 24 hours                 | 0.005         | 33.7%           |
| IV antiemetic administered within the past 24 hours               | 0.005         | 38.8%           |
| IV antipsychotic administered within the past 24 hours            | 0.005         | 6.9%            |

|                                                                                                                                               |       |       |
|-----------------------------------------------------------------------------------------------------------------------------------------------|-------|-------|
| Non-sinus rhythm recorded within the past 24 hours                                                                                            | 0.005 | 3.0%  |
| Limited home social support                                                                                                                   | 0.005 | 2.0%  |
| Patient/family prefer different facility                                                                                                      | 0.004 | 8.4%  |
| Serum sodium >150 mEq/L within the past 24 hours                                                                                              | 0.004 | 9.1%  |
| Outpatient services not available                                                                                                             | 0.004 | 0.2%  |
| Case management assessed the patient to be high risk                                                                                          | 0.003 | 74.0% |
| Requires services on discharge                                                                                                                | 0.003 | 61.5% |
| Speech is unclear                                                                                                                             | 0.003 | 6.6%  |
| Requires soft restraints                                                                                                                      | 0.003 | 5.8%  |
| Systolic blood pressure >180 mmHg within the past 24 hours                                                                                    | 0.002 | 52.2% |
| Abnormal creatinine within the past 24 hours                                                                                                  | 0.002 | 23.1% |
| Abnormal swallow study pharyngeal phase                                                                                                       | 0.002 | 5.0%  |
| Requires long-term acute care facility                                                                                                        | 0.002 | 2.8%  |
| IV diuretic administered within the past 24 hours                                                                                             | 0.002 | 10.6% |
| Suprapubic catheter in place                                                                                                                  | 0.002 | 0.2%  |
| Physical therapy recommends facility                                                                                                          | 0.001 | 23.6% |
| Open surgical wound                                                                                                                           | 0.001 | 3.0%  |
| Guardianship issues                                                                                                                           | 0.001 | 0.3%  |
| Recommended for swallow evaluation                                                                                                            | 0     | 4.6%  |
| Abnormal swallow evaluation response                                                                                                          | 0     | 4.6%  |
| Abnormal swallow evaluation oral phase                                                                                                        | 0     | 4.5%  |
| Abnormal swallow evaluation oral medication tolerance                                                                                         | 0     | 4.6%  |
| Abnormal cognition                                                                                                                            | 0     | 4.3%  |
| Insurance issues/uninsured                                                                                                                    | 0     | 2.5%  |
| Troponin elevated within the past 24 hours                                                                                                    | 0     | 2.0%  |
| External fecal management system device in place                                                                                              | 0     | 0.2%  |
| IV, intravenous; WBC, white blood cell count; mL, milliliter; mmol, millimoles; L, liter; g, grams; dL, deciliters; mmHg, millimeters mercury |       |       |

**eFigure 1.** Schema of Patients Included in the Training Set of the Neural Network Model

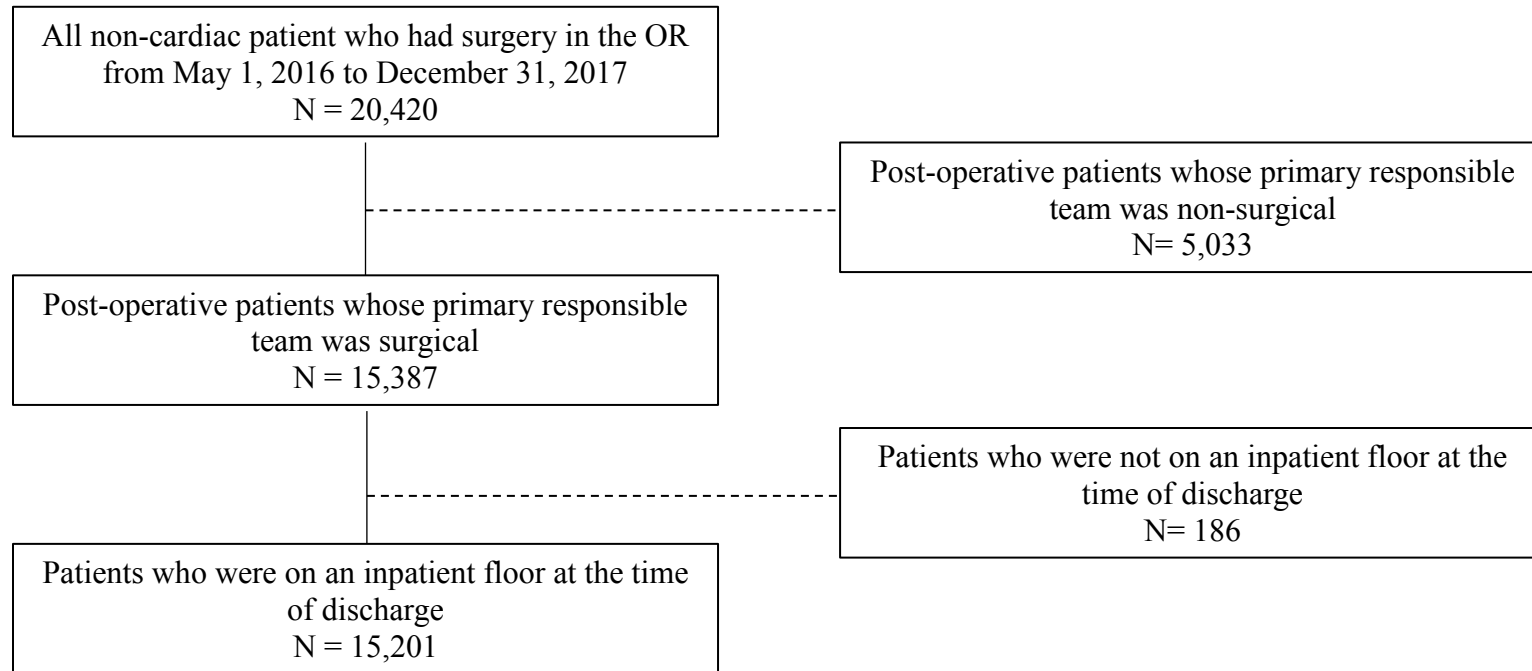

**eFigure 2.** Patient Populations and Cohorts With Corresponding Dates

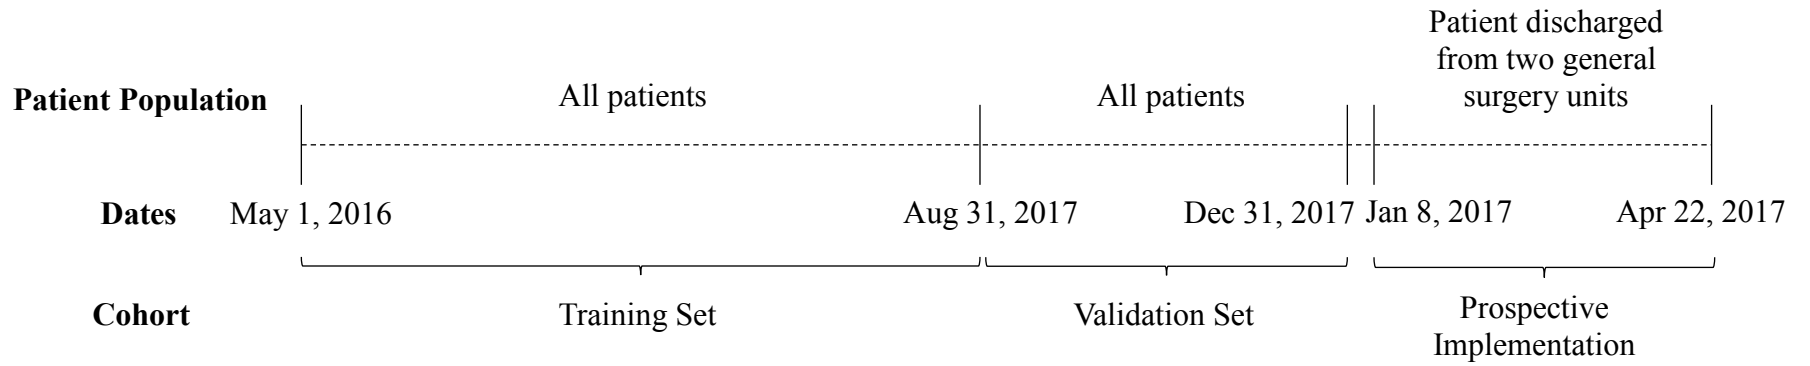

Supplement: jamanetwopen-2-e1917221-s001.pdf [file jamanetwopen-2-e1917221-s001.pdf]
